# Supplementary material for: Low-frequency (0–450 cm−1) dynamics of n-alkyl cyanide liquids studied by optical Kerr effect spectroscopy and density functional theory
Source: Royal Society of Chemistry journal article supplement (doi:10.1039/d4cp03376k), 2024-10-29
Supplement: d4cp03376k1.pdf [file d4cp03376k1.pdf]

# **Low-Frequency (0-450 cm<sup>-1</sup>) Dynamics of *n*-Alkyl Cyanide Liquids**

**Studied by**

**Optical Kerr Effect Spectroscopy and Density Functional Theory**

## ***Supplementary Information***

Dujuan Meng, Sophia Sagala, Edward L. Quitevis\*

Department of Chemistry and Biochemistry

Texas Tech University

Lubbock, TX 79409

### S1. Results from DFT calculations on *n*-alkyl cyanides.

In this study, DFT calculations were performed to further understand the intermolecular and intramolecular vibrational bands in the reduced spectral densities (RSDs) of the *n*-alkyl cyanides obtained by OHD-RIKES. The calculations were performed using NWChem6.8 program package and the COSMO solvation model.

**Table S1.** Cartesian coordinates (in Å) of methyl cyanide.

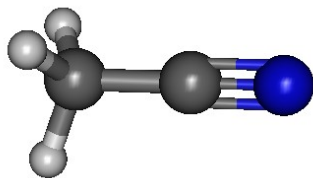

| Atom | x           | y           | z           |
|------|-------------|-------------|-------------|
| C    | -0.00000000 | 0.00000000  | 0.26859443  |
| N    | -0.00000000 | 0.00000000  | 1.42112723  |
| C    | 0.00000000  | 0.00000000  | -1.18565193 |
| H    | -0.62535376 | -0.81442980 | -1.55542665 |
| H    | 1.01799378  | -0.13435734 | -1.55542665 |
| H    | -0.39264002 | 0.94878715  | -1.55542665 |

**Table S2.** Cartesian coordinates (in Å) of ethyl cyanide.

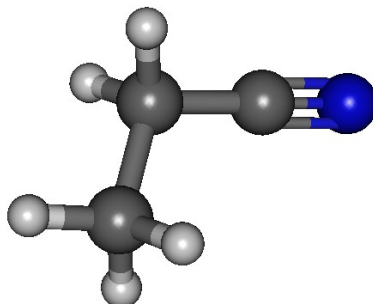

| Atom | x           | y           | z          |
|------|-------------|-------------|------------|
| C    | -0.14550140 | 0.87066093  | 0.00000000 |
| N    | 0.25134387  | 1.95343154  | 0.00000000 |
| C    | -0.63701917 | -0.50523708 | 0.00000000 |
| H    | -1.27538922 | -0.62814947 | 0.87926445 |
| C    | 0.49996708  | -1.54211371 | 0.00000000 |

|   |             |             |             |
|---|-------------|-------------|-------------|
| H | -1.27538922 | -0.62814947 | -0.87926445 |
| H | 1.12700561  | -1.43561193 | 0.88666983  |
| H | 1.12700561  | -1.43561193 | -0.88666983 |
| H | 0.06900212  | -2.54439782 | 0.00000000  |

**Table S3.** Cartesian coordinates (in Å) of propyl cyanide staggered-anti.

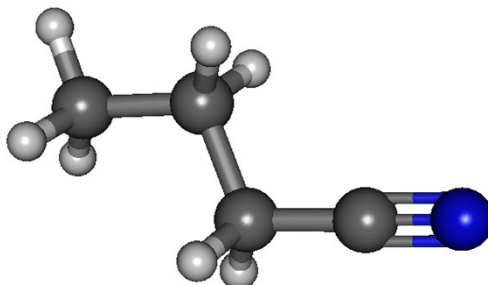

| Atom | x           | y           | z           |
|------|-------------|-------------|-------------|
| C    | -0.14264097 | 1.53414231  | 0.00000000  |
| N    | 0.24143989  | 2.62154904  | 0.00000000  |
| C    | -0.61410004 | 0.15265407  | 0.00000000  |
| H    | -1.24996388 | 0.01567465  | 0.88011044  |
| C    | 0.53800242  | -0.87375346 | 0.00000000  |
| H    | -1.24996388 | 0.01567465  | -0.88011044 |
| H    | 1.16567912  | -0.70484321 | 0.87926936  |
| H    | 1.16567912  | -0.70484321 | -0.87926936 |
| C    | 0.00614709  | -2.30757688 | 0.00000000  |
| H    | -0.60780440 | -2.50108533 | 0.88439001  |
| H    | 0.83088483  | -3.02396997 | 0.00000000  |
| H    | -0.60780440 | -2.50108533 | -0.88439001 |

**Table S4.** Cartesian coordinates (in Å) of propyl cyanide staggered-gauche.

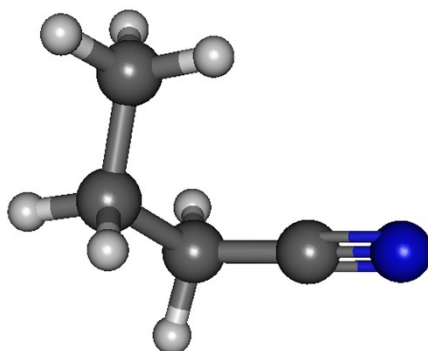

| Atom | x           | y           | z           |
|------|-------------|-------------|-------------|
| C    | -0.09446835 | 1.29931752  | 0.06346522  |
| N    | 0.60166515  | 2.20512397  | -0.09453125 |
| C    | -0.96326858 | 0.14082258  | 0.25624507  |
| H    | -1.08474563 | -0.01399981 | 1.33327449  |
| C    | -0.42278130 | -1.14149860 | -0.41235663 |
| H    | -1.94810648 | 0.39603000  | -0.14489295 |
| C    | 0.90916160  | -1.61982628 | 0.16733374  |
| H    | -0.32930808 | -0.96887001 | -1.48814130 |
| H    | -1.18650120 | -1.91216979 | -0.27944082 |
| H    | 1.70064307  | -0.88021904 | 0.01655660  |
| H    | 1.22605620  | -2.54781154 | -0.31449434 |
| H    | 0.82479951  | -1.80896238 | 1.24163892  |

**Table S5.** Cartesian coordinates (in Å) of butyl cyanide staggered-anti.

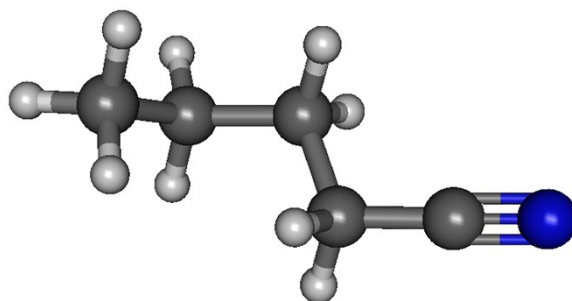

| Atom | x           | y          | z           |
|------|-------------|------------|-------------|
| C    | -0.18418860 | 2.03762512 | 0.06571567  |
| N    | -0.05194847 | 3.13974731 | -0.24729943 |
| C    | -0.33759912 | 0.63861705 | 0.45091786  |
| H    | -0.26129746 | 0.57885253 | 1.54184495  |

|   |             |             |             |
|---|-------------|-------------|-------------|
| C | 0.71614748  | -0.27694073 | -0.20982719 |
| H | -1.35240678 | 0.33436928  | 0.18213950  |
| H | 1.71036912  | 0.08863248  | 0.06059494  |
| H | 0.62887935  | -0.19532463 | -1.29809491 |
| C | 0.57735335  | -1.74545302 | 0.21515477  |
| H | 0.62460852  | -1.80964726 | 1.30868596  |
| H | 1.45262568  | -2.28499725 | -0.16061860 |
| C | -0.69220969 | -2.43967971 | -0.29098086 |
| H | -1.60101320 | -1.98965671 | 0.11854883  |
| H | -0.69425082 | -3.49523848 | -0.00651133 |
| H | -0.75655061 | -2.38857495 | -1.38245362 |

**Table S6.** Cartesian coordinates (in Å) of butyl cyanide staggered-gauche.

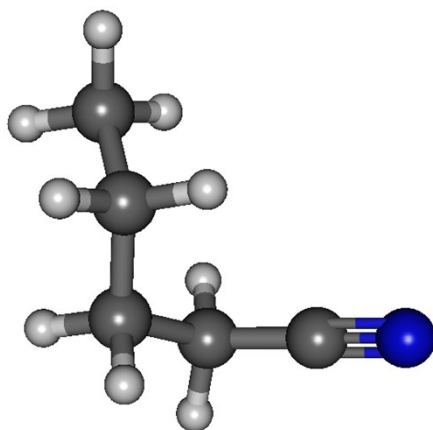

| Atom | x           | y           | z           |
|------|-------------|-------------|-------------|
| C    | 0.07873391  | -1.71895021 | -0.10998276 |
| N    | 0.80561779  | -2.52783636 | 0.27403194  |
| C    | -0.84430857 | -0.68857331 | -0.57898563 |
| H    | -0.48162777 | -0.33063353 | -1.54617118 |
| C    | -1.00665928 | 0.47777164  | 0.42198151  |
| H    | -1.81169062 | -1.16681625 | -0.75583204 |
| C    | 0.26971703  | 1.28738327  | 0.68696253  |
| H    | -1.38922142 | 0.07601889  | 1.36446175  |
| H    | -1.78302522 | 1.13514361  | 0.01849040  |
| H    | 0.05593979  | 1.99267725  | 1.49659981  |
| C    | 0.79101686  | 2.06167834  | -0.52859570 |
| H    | 1.05393903  | 0.62142771  | 1.06530800  |
| H    | 0.02675149  | 2.74429941  | -0.91348887 |
| H    | 1.08431020  | 1.39408614  | -1.34365700 |

H 1.66767848 2.65771288 -0.26132060

**Table S7.** Cartesian coordinates (in Å) of pentyl cyanide staggered-anti.

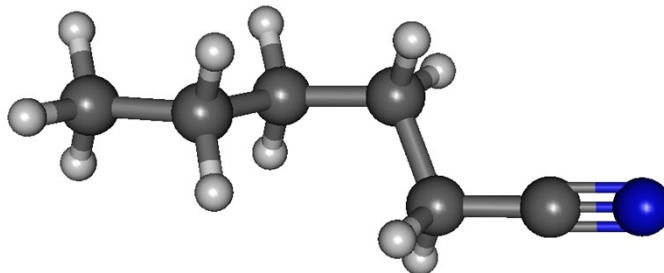

| Atom | x           | y           | z           |
|------|-------------|-------------|-------------|
| C    | -0.25438739 | 2.64952157  | 0.08305936  |
| N    | -0.17802979 | 3.76255438  | -0.20915901 |
| C    | -0.33406851 | 1.23651345  | 0.44012526  |
| H    | -0.27413906 | 1.16033185  | 1.53101531  |
| C    | 0.78605671  | 0.39851182  | -0.21624187 |
| H    | -1.32444151 | 0.87896875  | 0.14659799  |
| H    | 1.74995122  | 0.82959737  | 0.06723637  |
| H    | 0.70575684  | 0.48409380  | -1.30466088 |
| C    | 0.74994685  | -1.07905347 | 0.19712361  |
| H    | 0.76217030  | -1.14905910 | 1.29224458  |
| H    | 1.67908096  | -1.54601089 | -0.14852624 |
| C    | -0.43549000 | -1.88099910 | -0.35558823 |
| H    | -1.38051165 | -1.45985282 | 0.00460644  |
| C    | -0.37211549 | -3.36313256 | 0.02682190  |
| H    | -0.45193438 | -1.78487176 | -1.44785549 |
| H    | -0.38814467 | -3.48985843 | 1.11392048  |
| H    | 0.54593426  | -3.82649776 | -0.34797063 |
| H    | -1.21936149 | -3.91710775 | -0.38649312 |

**Table S8.** Cartesian coordinates (in Å) of pentyl cyanide staggered-gauche.

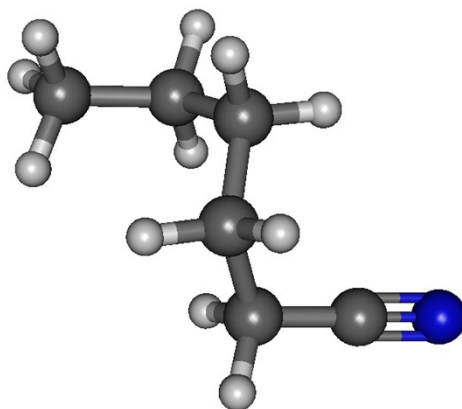

| Atom | x           | y           | z           |
|------|-------------|-------------|-------------|
| C    | 0.06956041  | -2.18159625 | -0.21788823 |
| N    | 0.80176933  | -3.03652467 | 0.03348784  |
| C    | -0.85816711 | -1.09545125 | -0.52422990 |
| H    | -0.51874105 | -0.61825778 | -1.44751213 |
| C    | -0.98856543 | -0.06765951 | 0.62203772  |
| H    | -1.83304006 | -1.54346020 | -0.73584447 |
| C    | 0.30546222  | 0.68255071  | 0.96953707  |
| H    | -1.35524920 | -0.58499801 | 1.51295536  |
| H    | -1.77050808 | 0.63682473  | 0.32715967  |
| H    | 0.10286184  | 1.31058553  | 1.84470912  |
| C    | 0.88979679  | 1.56429010  | -0.14659581 |
| H    | 1.06506258  | -0.04175316 | 1.28555945  |
| C    | -0.02420651 | 2.71404822  | -0.58526036 |
| H    | 1.14777855  | 0.94842073  | -1.01575134 |
| H    | 1.83678906  | 1.97984131  | 0.21428013  |
| H    | -0.95260670 | 2.35015258  | -1.03410930 |
| H    | 0.47244074  | 3.34696277  | -1.32594588 |
| H    | -0.29411642 | 3.34637635  | 0.26686073  |

**Table S9.** Moments of inertia of n-alkyl cyanides from DFT calculations.

| Alkyl cyanide     | Moments of inertia (a.u) <sup>a</sup>                                |                                                                    |                                                                     |
|-------------------|----------------------------------------------------------------------|--------------------------------------------------------------------|---------------------------------------------------------------------|
|                   | Staggered-anti conformer                                             |                                                                    |                                                                     |
|                   | <b>xx</b>                                                            | <b>yy</b>                                                          | <b>zz</b>                                                           |
| Methyl<br>Cyanide | 197.391662540769000<br>-0.00000000000000000<br>-0.00000000000000000  | -0.00000000000000000<br>11.291753926899000<br>0.00000000000000000  | -0.00000000000000000<br>0.00000000000000000<br>197.391662540769000  |
| Ethyl<br>Cyanide  | 382.101437800606000<br>0.000000022814000<br>0.00000000000000000      | 0.000000022814000<br>64.551396037587000<br>0.00000000000000000     | 0.00000000000000000<br>0.00000000000000000<br>424.185107684286000   |
| Propyl<br>Cyanide | 792.226965621954000<br>0.000000101094000<br>0.00000000000000000      | 0.000000101094000<br>76.022461737610000<br>0.00000000000000000     | 0.00000000000000000<br>0.00000000000000000<br>834.565189369516000   |
| Butyl<br>Cyanide  | 1214.098691847860000<br>-0.00000000000000000<br>-0.00000000000000000 | -0.00000000000000000<br>151.884824819469000<br>0.00000000000000000 | -0.00000000000000000<br>0.00000000000000000<br>1273.598797586020000 |
| Pentyl<br>Cyanide | 1965.730574717400000<br>-0.00000000000000000<br>-0.00000000000000000 | -0.00000000000000000<br>177.277230215807000<br>0.00000000000000000 | -0.00000000000000000<br>0.00000000000000000<br>2038.211491737100000 |

<sup>a</sup>1 a.u. = 4.683 x 10<sup>-48</sup> kg·m<sup>2</sup>



**Table S10.** Internal energy E+ZPE, Gibbs free energy, G, entropic contribution, T·S, for *n*-alkyl cyanides.

| Alkyl Cyanides                       | Energy + ZPE<br>(kcal/mol) | G<br>(kcal/mol) | T·S<br>(kcal/mol) |
|--------------------------------------|----------------------------|-----------------|-------------------|
| Methyl Cyanide                       | -83307.66                  | -83321.88       | 17.24             |
| Ethyl Cyanide                        | -107965.39                 | -107981.92      | 20.24             |
| Propyl Cyanide<br>(staggered-anti)   | -132624.25                 | -132642.34      | 22.54             |
| Propyl Cyanide<br>(staggered-gauche) | -132623.97                 | -132642.03      | 22.50             |
| Butyl Cyanide<br>(staggered-anti)    | -157281.99                 | -157301.60      | 24.78             |
| Butyl Cyanide<br>(staggered-gauche)  | -157281.81                 | -157301.28      | 24.60             |
| Pentyl Cyanide<br>(staggered-anti)   | -181940.44                 | -181961.86      | 27.31             |
| Pentyl Cyanide<br>(staggered-gauche) | -181939.49                 | -181960.60      | 26.97             |

**Table S11.** Raman vibrational frequencies and depolarization ratios for *n*-alkyl cyanides.

| Mode | methyl cyanide       |                 | ethyl cyanide        |                 | propyl cyanide       |                 |                      |                 | butyl cyanide        |                 |                      |                 | pentyl cyanide       |                 |                      |                 |
|------|----------------------|-----------------|----------------------|-----------------|----------------------|-----------------|----------------------|-----------------|----------------------|-----------------|----------------------|-----------------|----------------------|-----------------|----------------------|-----------------|
|      |                      |                 |                      |                 | anti                 |                 | gauche               |                 | anti                 |                 | gauche               |                 | anti                 |                 | gauche               |                 |
|      | $\nu/\text{cm}^{-1}$ | $R_{\text{dp}}$ |
| 1    | 396                  | 0.75            | 219                  | 0.75            | 95                   | 0.75            | 100                  | 0.75            | 62                   | 0.75            | 61                   | 0.75            | 43                   | 0.75            | 34                   | 0.75            |
| 2    | 396                  | 0.75            | 220                  | 0.75            | 171                  | 0.75            | 178                  | 0.74            | 118                  | 0.75            | 125                  | 0.75            | 66                   | 0.75            | 72                   | 0.75            |
| 3    | 926                  | 0.07            | 406                  | 0.75            | 232                  | 0.72            | 260                  | 0.71            | 161                  | 0.61            | 194                  | 0.73            | 107                  | 0.74            | 147                  | 0.71            |
| 4    | 1062                 | 0.75            | 564                  | 0.26            | 346                  | 0.48            | 355                  | 0.55            | 246                  | 0.75            | 260                  | 0.75            | 181                  | 0.75            | 194                  | 0.72            |
| 5    | 1062                 | 0.72            | 787                  | 0.75            | 404                  | 0.75            | 392                  | 0.75            | 300                  | 0.70            | 321                  | 0.54            | 237                  | 0.27            | 264                  | 0.74            |
| 6    | 1399                 | 0.50            | 837                  | 0.10            | 545                  | 0.17            | 573                  | 0.24            | 403                  | 0.75            | 403                  | 0.75            | 260                  | 0.45            | 279                  | 0.60            |
| 7    | 1451                 | 0.75            | 1008                 | 0.36            | 739                  | 0.75            | 761                  | 0.08            | 432                  | 0.22            | 423                  | 0.72            | 296                  | 0.06            | 373                  | 0.75            |
| 8    | 1451                 | 0.75            | 1086                 | 0.21            | 871                  | 0.36            | 842                  | 0.14            | 546                  | 0.15            | 580                  | 0.18            | 403                  | 0.75            | 400                  | 0.75            |
| 9    | 2353                 | 0.25            | 1109                 | 0.75            | 877                  | 0.20            | 879                  | 0.49            | 739                  | 0.18            | 743                  | 0.18            | 462                  | 0.30            | 464                  | 0.64            |
| 10   | 3052                 | 0.00            | 1284                 | 0.75            | 950                  | 0.41            | 923                  | 0.48            | 781                  | 0.13            | 802                  | 0.11            | 567                  | 0.19            | 583                  | 0.17            |
| 11   | 3128                 | 0.75            | 1341                 | 0.41            | 1038                 | 0.71            | 1053                 | 0.75            | 878                  | 0.41            | 833                  | 0.24            | 730                  | 0.74            | 726                  | 0.37            |
| 12   | 3128                 | 0.75            | 1403                 | 0.36            | 1107                 | 0.22            | 1093                 | 0.65            | 924                  | 0.56            | 922                  | 0.64            | 752                  | 0.41            | 767                  | 0.13            |
| 13   |                      |                 | 1447                 | 0.68            | 1126                 | 0.69            | 1120                 | 0.32            | 947                  | 0.30            | 945                  | 0.30            | 844                  | 0.15            | 824                  | 0.04            |
| 14   |                      |                 | 1486                 | 0.75            | 1255                 | 0.72            | 1245                 | 0.56            | 983                  | 0.70            | 980                  | 0.54            | 860                  | 0.27            | 874                  | 0.61            |
| 15   |                      |                 | 1486                 | 0.72            | 1300                 | 0.51            | 1279                 | 0.33            | 1070                 | 0.62            | 1072                 | 0.61            | 941                  | 0.05            | 885                  | 0.56            |
| 16   |                      |                 | 2341                 | 0.24            | 1321                 | 0.74            | 1347                 | 0.62            | 1116                 | 0.67            | 1110                 | 0.65            | 973                  | 0.34            | 971                  | 0.14            |
| 17   |                      |                 | 3044                 | 0.01            | 1372                 | 0.46            | 1370                 | 0.58            | 1131                 | 0.57            | 1125                 | 0.60            | 986                  | 0.58            | 978                  | 0.75            |

|    |      |      |      |      |      |      |      |      |      |      |      |      |      |      |
|----|------|------|------|------|------|------|------|------|------|------|------|------|------|------|
| 18 | 3047 | 0.08 | 1408 | 0.19 | 1409 | 0.26 | 1226 | 0.41 | 1225 | 0.66 | 1025 | 0.32 | 1014 | 0.62 |
| 19 | 3082 | 0.75 | 1444 | 0.70 | 1444 | 0.64 | 1274 | 0.57 | 1253 | 0.26 | 1073 | 0.73 | 1077 | 0.65 |
| 20 | 3117 | 0.75 | 1474 | 0.74 | 1475 | 0.74 | 1308 | 0.75 | 1316 | 0.65 | 1123 | 0.74 | 1121 | 0.42 |
| 21 | 3119 | 0.66 | 1486 | 0.75 | 1485 | 0.75 | 1325 | 0.74 | 1349 | 0.62 | 1136 | 0.33 | 1123 | 0.70 |
| 22 |      |      | 1495 | 0.42 | 1496 | 0.53 | 1375 | 0.51 | 1379 | 0.53 | 1218 | 0.39 | 1208 | 0.68 |
| 23 |      |      | 2341 | 0.25 | 2339 | 0.24 | 1379 | 0.66 | 1384 | 0.60 | 1266 | 0.23 | 1230 | 0.62 |
| 24 |      |      | 3021 | 0.01 | 3021 | 0.01 | 1411 | 0.74 | 1410 | 0.68 | 1298 | 0.60 | 1282 | 0.63 |
| 25 |      |      | 3031 | 0.08 | 3039 | 0.12 | 1446 | 0.74 | 1452 | 0.65 | 1307 | 0.58 | 1317 | 0.49 |
| 26 |      |      | 3040 | 0.04 | 3041 | 0.12 | 1472 | 0.74 | 1476 | 0.74 | 1330 | 0.74 | 1349 | 0.71 |
| 27 |      |      | 3059 | 0.75 | 3068 | 0.63 | 1484 | 0.70 | 1477 | 0.74 | 1346 | 0.73 | 1364 | 0.75 |
| 28 |      |      | 3076 | 0.74 | 3082 | 0.56 | 1494 | 0.75 | 1492 | 0.69 | 1382 | 0.55 | 1387 | 0.66 |
| 29 |      |      | 3090 | 0.60 | 3091 | 0.59 | 1498 | 0.25 | 1501 | 0.75 | 1397 | 0.24 | 1392 | 0.65 |
| 30 |      |      | 3092 | 0.72 | 3092 | 0.59 | 2340 | 0.13 | 2339 | 0.24 | 1403 | 0.68 | 1405 | 0.75 |
| 31 |      |      |      |      |      |      | 3011 | 0.02 | 3014 | 0.07 | 1446 | 0.71 | 1452 | 0.67 |
| 32 |      |      |      |      |      |      | 3017 | 0.25 | 3018 | 0.24 | 1469 | 0.73 | 1475 | 0.75 |
| 33 |      |      |      |      |      |      | 3027 | 0.32 | 3031 | 0.26 | 1483 | 0.67 | 1483 | 0.74 |
| 34 |      |      |      |      |      |      | 3041 | 0.34 | 3047 | 0.45 | 1484 | 0.75 | 1483 | 0.74 |
| 35 |      |      |      |      |      |      | 3047 | 0.71 | 3054 | 0.05 | 1487 | 0.66 | 1490 | 0.70 |
| 36 |      |      |      |      |      |      | 3067 | 0.29 | 3073 | 0.52 | 1502 | 0.74 | 1504 | 0.74 |
| 37 |      |      |      |      |      |      | 3079 | 0.74 | 3080 | 0.69 | 2341 | 0.25 | 2338 | 0.24 |
| 38 |      |      |      |      |      |      | 3083 | 0.18 | 3084 | 0.64 | 3001 | 0.13 | 3007 | 0.63 |
| 39 |      |      |      |      |      |      | 3090 | 0.75 | 3095 | 0.69 | 3010 | 0.07 | 3011 | 0.17 |

|    |      |      |      |      |
|----|------|------|------|------|
| 40 | 3014 | 0.00 | 3015 | 0.03 |
| 41 | 3025 | 0.72 | 3035 | 0.44 |
| 42 | 3034 | 0.06 | 3038 | 0.15 |
| 43 | 3042 | 0.04 | 3047 | 0.11 |
| 44 | 3051 | 0.45 | 3051 | 0.05 |
| 45 | 3068 | 0.57 | 3074 | 0.75 |
| 46 | 3075 | 0.75 | 3077 | 0.25 |
| 47 | 3080 | 0.62 | 3082 | 0.71 |
| 48 | 3091 | 0.58 | 3091 | 0.71 |

$R_{dp}$  = depolarization ratio

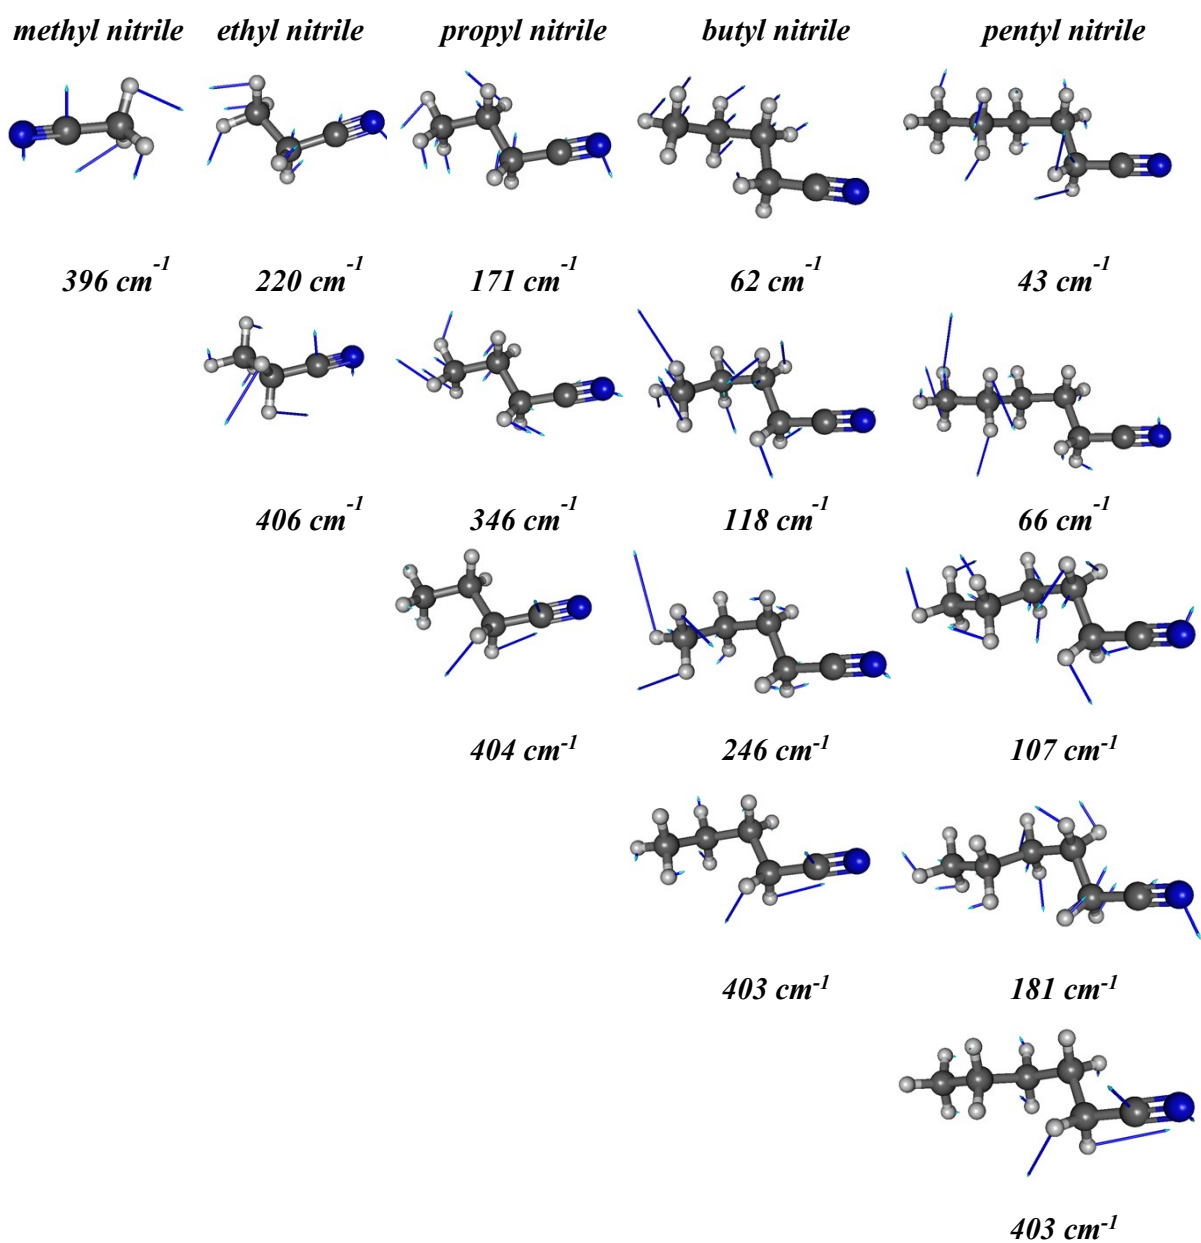

**Figure S1.** Low frequency ( $< 405\text{ cm}^{-1}$ ) depolarized Raman-active modes of n-alkyl cyanides calculated on the basis of the B3LYP/6311 G(d,p) level of theory. The motions of atoms are shown by the displacement vectors.

## S2. OHD-RIKES time-domain responses in the -2-10 ps time range.

The OHD-RIKES time-domain responses of alkyl nitriles (Figure S2) were normalized at the coherent spike ( $t = 0$  ps) and then fit by a biexponential decay function in the 1 to 10 ps time range. Figure S3 shows the normalized signals in the -0.5 to 3 ps time range. In this figure, we can see that the intensity of the non-instantaneous part of the OHD-RIKES response increases in going from longer to shorter alkyl chains. The time-domain responses were then fit by a triexponential (eq 1 in the text) in the 1 -10 ps time range yielding a fast decay  $\tau_f \equiv \tau_1$  and intermediate decay  $\tau_i \equiv \tau_2$ , with  $\tau_3$  constrained to  $\tau_s$  from the paper of Zhu et al.<sup>1</sup> The fit parameters are given in Table 1 of the text. The decay times  $\tau_1$  and  $\tau_2$  are in good agreement with the values in the study of Zhu *et al.*

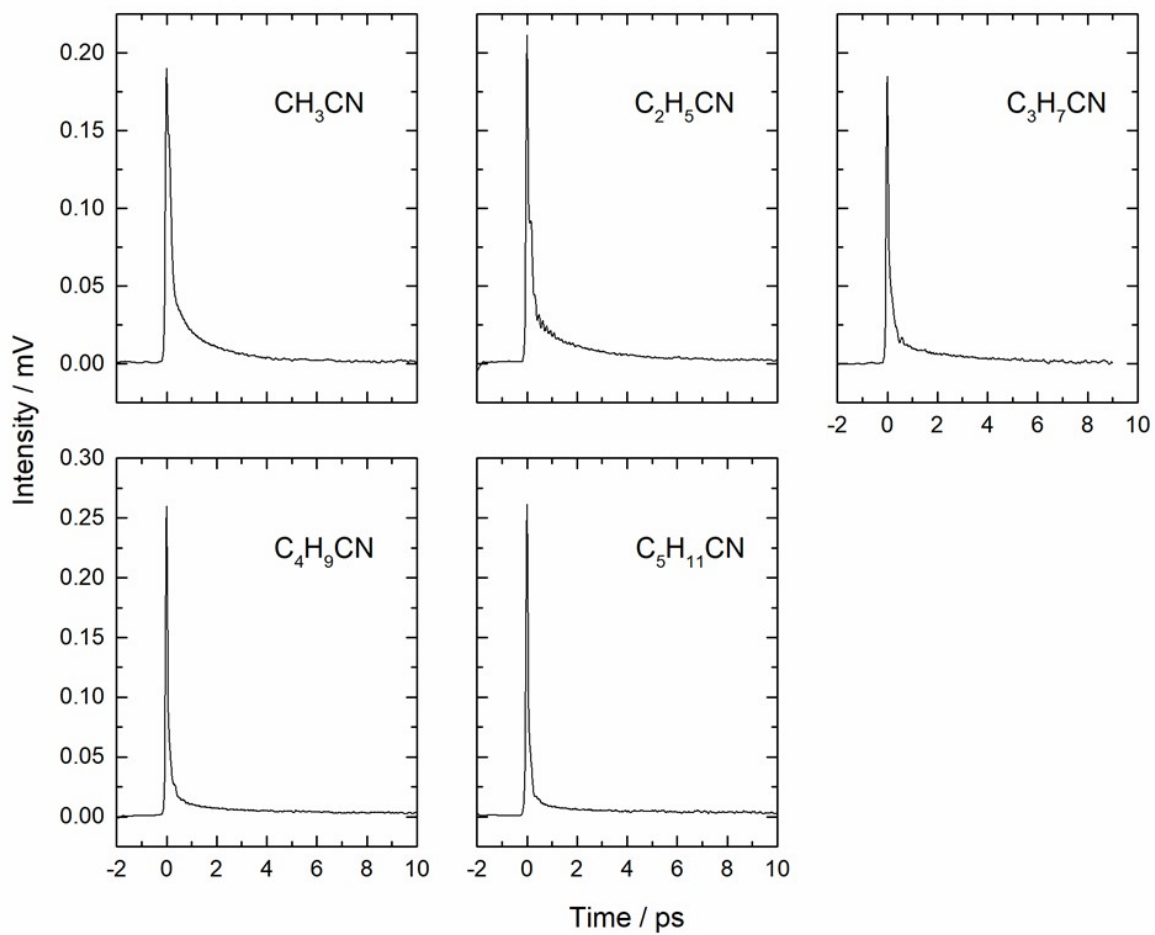

**Figure S2.** OHD-RIKES time-domain responses in the -2-10 ps time range. For n-propyl cyanide, the signal is shown only up to 9 ps because of the noise at 9-10 ps. But this does not affect the results for the triexponential fits and the RSDs.

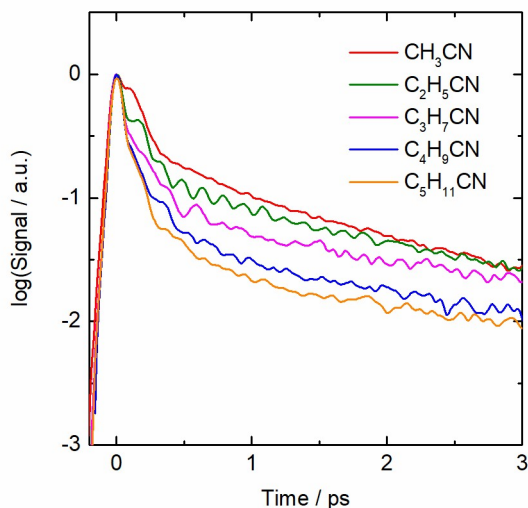

**Figure S3.** Semilogarithmic plot of the OHD-RIKES time responses of *n*-alkyl cyanides in the 0.5 to 3 ps time range. The responses are normalized at the coherent spike at  $t = 0$  ps.

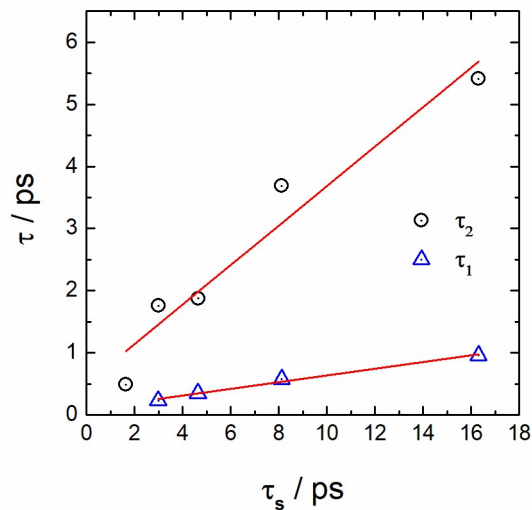

**Figure S4.** The linear correlation of  $\tau_1$  vs.  $\tau_s$  and  $\tau_2$  vs.  $\tau_s$ . The solid lines are described by the equations  $\tau_1 = 0.054 \cdot \tau_s + 0.098$  with  $R^2 = 0.9852$ ,  $\tau_2 = 0.318 \cdot \tau_s + 0.506$  with  $R^2 = 0.9247$ .

Shown in Fig. S4 are linear correlations of  $\tau_1$  vs.  $\tau_s$  and  $\tau_2$  vs.  $\tau_s$ . These correlations indicate that the fast ( $\tau_f = \tau_1$ ) and intermediate ( $\tau_i = \tau_2$ ) processes are dominated by the rate of structural relaxation. Although the nature of the intermediate relaxation time  $\tau_i$  is not well understood, for most liquids it is correlated to  $\tau_s$ .<sup>2</sup> One explanation for the intermediate relaxation time  $\tau_i$  is that it



is associated with spectral diffusion, which arises from fluctuations in the frequencies of the intermolecular modes (motional narrowing).<sup>2, 3</sup>

**S3. Multi-component fit parameters.**

**Table S12.** Multi-component fit parameters for the RSDs of *n*-alkyl cyanides in the 0 – 250 cm<sup>-1</sup> region.<sup>a,b</sup>

| <i>n</i> -alkyl<br>cyanides       | BL              |      |               | AG1             |               |            | AG2             |               |            | AG3             |               |            | AG4             |               |            | AG5             |               |            | $\chi^2$ |
|-----------------------------------|-----------------|------|---------------|-----------------|---------------|------------|-----------------|---------------|------------|-----------------|---------------|------------|-----------------|---------------|------------|-----------------|---------------|------------|----------|
|                                   | A <sub>BL</sub> | a    | $\omega_{BL}$ | A <sub>AG</sub> | $\omega_{AG}$ | $\epsilon$ |          |
| CH <sub>3</sub> CN                | 0.051           | 1.25 | 18            | 0.601           | 62            | 28         | 0.180           | 109           | 32         | -               | -             | -          | -               | -             | -          |                 |               |            | 0.9996   |
| C <sub>2</sub> H <sub>5</sub> CN  | 0.042           | 1.31 | 15            | 0.613           | 49            | 26         | 0.195           | 91            | 26         | 0.365           | 222           | 15         | -               | -             | -          |                 |               |            | 0.9930   |
| C <sub>3</sub> H <sub>7</sub> CN  | 0.040           | 1.30 | 14            | 0.620           | 39            | 24         | 0.332           | 81            | 24         | 0.239           | 122           | 13         | 0.207           | 180           | 27         |                 |               |            | 0.9930   |
| C <sub>4</sub> H <sub>9</sub> CN  | 0.018           | 1.76 | 9             | 0.607           | 35            | 30         | 0.396           | 73            | 28         | 0.297           | 119           | 26         | 0.123           | 210           | 21         |                 |               |            | 0.9982   |
| C <sub>5</sub> H <sub>11</sub> CN | 0.035           | 1.58 | 7             | 0.715           | 28            | 20         | 0.625           | 64            | 22         | 0.295           | 99            | 21         | 0.069           | 143           | 41         | 0.071           | 214           | 15         | 0.9998   |

<sup>a</sup>See eq 7 and 8 in text for definition of fit parameters.

<sup>b</sup>Units of  $\omega_{BL}$ ,  $\omega_{AG}$ , and  $\epsilon$  are in cm<sup>-1</sup>.

#### S4. DSE plots - reorientation time vs. $\eta/T$

In Figure S5 are shown DSE plots for *n*-alkyl cyanides with the reorientation times taken from study of Zhu et al.<sup>1</sup> The data and fit parameters are given in Table S13.

**Table S13.** Viscosities and reorientation times for *n*-alkyl cyanide.

| Methyl Cyanide |                  |               |                                                                                 |
|----------------|------------------|---------------|---------------------------------------------------------------------------------|
| T / K          | $\eta^2$ / mPa·s | $\tau^2$ / ps | Slope: 1.118(9)                                                                 |
| 230            | 0.795            | 4.12(5)       |                                                                                 |
| 234            | 0.745            | 3.83(5)       |                                                                                 |
| 254            | 0.566            | 2.73(5)       |                                                                                 |
| 270            | 0.462            | 2.12(5)       |                                                                                 |
| 293            | 0.359            | 1.64(5)       |                                                                                 |
| 307            | 0.313            | 1.42(5)       |                                                                                 |
| 321            | 0.276            | 1.22(5)       |                                                                                 |
| 344            | 0.227            | 0.98(5)       |                                                                                 |
| Ethyl Cyanide  |                  |               |                                                                                 |
| T / K          | $\eta^4$ / mPa·s | $\tau^1$ / ps | Slope 1: 1.51(2)<br>Slope 2: 0.86(6)<br>Transition<br>temperature:<br>224(42) K |
| 193.3          | 2.78847          | 16.9(3)       |                                                                                 |
| 200.6          | 2.30278          | 14.3(3)       |                                                                                 |
| 209.3          | 1.866            | 11.6(2)       |                                                                                 |
| 220.8          | 1.45015          | 10.3(2)       |                                                                                 |
|                |                  |               |                                                                                 |
| 221.4          | 1.43225          | 10.4(2)       |                                                                                 |
| 237.3          | 1.05474          | 7.2(1)        |                                                                                 |
| 255.4          | 0.78042          | 5.1(1)        |                                                                                 |
| 272.4          | 0.61026          | 4.05(7)       |                                                                                 |
| 289            | 0.49375          | 3.16(5)       |                                                                                 |
| 304.9          | 0.41199          | 2.48(8)       |                                                                                 |
| 321.2          | 0.34871          | 2.24(3)       |                                                                                 |
| 337.4          | 0.30027          | 1.9(7)        |                                                                                 |
| 357.4          | 0.2544           | 1.49(6)       |                                                                                 |
| Propyl Cyanide |                  |               |                                                                                 |
| T / K          | $\eta^4$ / mPa·s | $\tau^1$ / ps | Slope 1: 2.04(6)<br>Slope 2: 1.65(4)<br>Transition<br>temperature:              |
| 209.5          | 2.53912          | 23(1)         |                                                                                 |
| 219.6          | 2.00573          | 17.8(7)       |                                                                                 |
| 242.1          | 1.27306          | 11.8(9)       |                                                                                 |
| 258.1          | 0.96694          | 8.9(9)        |                                                                                 |

|                |                  |               |                                                                              |
|----------------|------------------|---------------|------------------------------------------------------------------------------|
| 273.9          | 0.76057          | 6.0(3)        | 237.87 K                                                                     |
| 289.2          | 0.61807          | 4.8(2)        |                                                                              |
| 296.7          | 0.56268          | 4.5(2)        |                                                                              |
| 313.3          | 0.46447          | 3.7(2)        |                                                                              |
| 330            | 0.39049          | 3.0(2)        |                                                                              |
| 346            | 0.33592          | 2.5(1)        |                                                                              |
| 362            | 0.29285          | 2.23(8)       |                                                                              |
| 368            | 0.27902          | 2.05(7)       |                                                                              |
| Butyl Cyanide  |                  |               |                                                                              |
| T / K          | $\eta^4$ / mPa·s | $\tau^1$ / ps | Slope 1: 3.0(2)<br>Slope 2: 2.1(2)<br>Transition<br>temperature:<br>258.43 K |
| 245.2          | 1.60136          | 18(1)         |                                                                              |
| 254            | 1.3641           | 16.0(3)       |                                                                              |
| 262.8          | 1.17431          | 13.7(6)       |                                                                              |
| 271.6          | 1.02061          | 12.8(8)       |                                                                              |
| 280.3          | 0.89603          | 10.4(7)       |                                                                              |
| 288.8          | 0.79492          | 8.8(4)        |                                                                              |
| 297.5          | 0.70815          | 7.4(5)        |                                                                              |
| 306.2          | 0.63495          | 7.0(2)        |                                                                              |
| 314.9          | 0.5727           | 5.5(2)        |                                                                              |
| 323.7          | 0.51882          | 5.5(3)        |                                                                              |
| 332.4          | 0.47292          | 4.8(2)        |                                                                              |
| 340.9          | 0.43396          | 4.3(2)        |                                                                              |
| 349.5          | 0.39947          | 4.1(3)        |                                                                              |
| 357.9          | 0.36983          | 3.8(2)        |                                                                              |
| 366.5          | 0.343            | 3.5(3)        |                                                                              |
| Pentyl Cyanide |                  |               |                                                                              |
| T / K          | $\eta^4$ / mPa·s | $\tau^1$ / ps | Slope 1: 5.4(3)<br>Slope 2: 3.2(5)<br>Transition<br>temperature:<br>298.54 K |
| 271.1          | 1.42673          | 22.1(7)       |                                                                              |
| 288.9          | 1.05372          | 16.6(4)       |                                                                              |
| 297.3          | 0.92606          | 16(1)         |                                                                              |
| 305.7          | 0.82024          | 13.5(7)       |                                                                              |
| 314.1          | 0.73169          | 10.9(2)       |                                                                              |
| 323.8          | 0.64645          | 8.8(3)        |                                                                              |
| 341.3          | 0.5271           | 6.8(2)        |                                                                              |

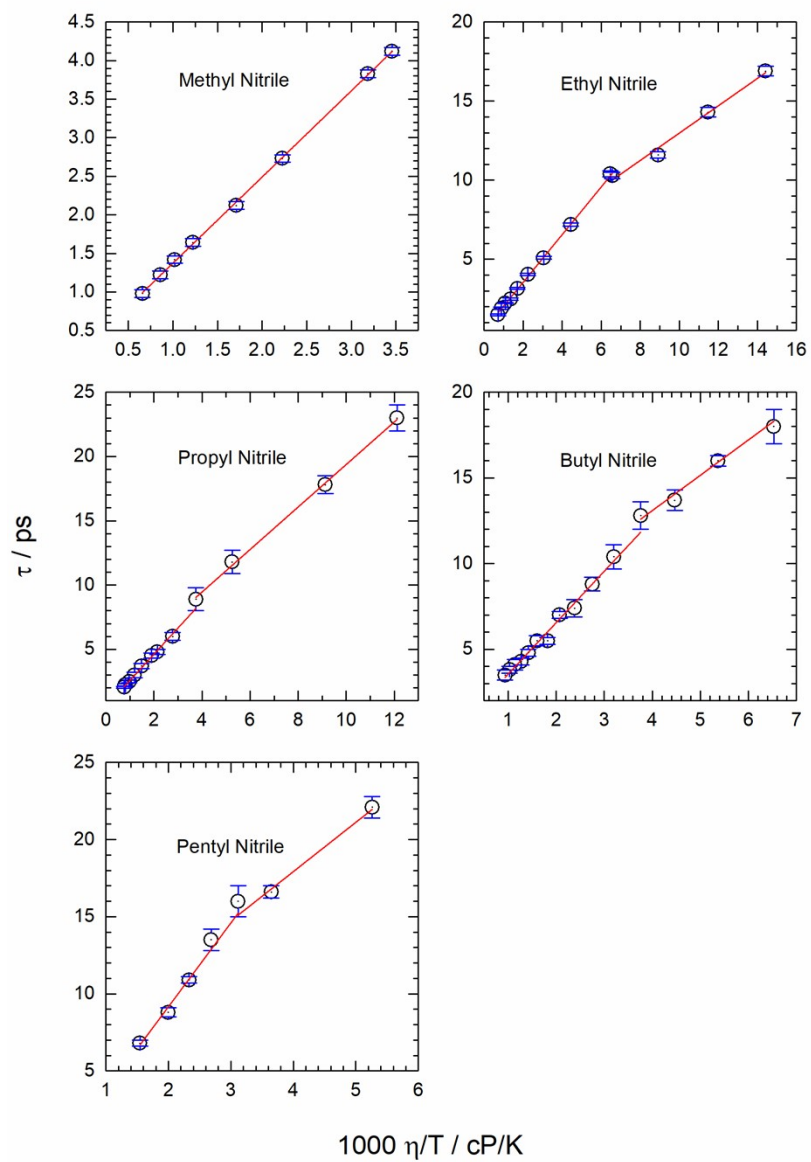

**Figure S5.** Debye-Stokes-Einstein plots for alkyl cyanides.

## S5. Density of *n*-alkyl cyanides

Table S14 gives the literature values<sup>5</sup> of the densities of *n*-alkyl nitriles as a function of temperature, with plots of the density vs. temperature shown in Figure S6 and linear fit parameters listed in Table S15.

**Table S14.** Densities of *n*-alkyl cyanides.<sup>5</sup>

| Temp<br>K | CH <sub>3</sub> CN<br>g·cm <sup>-3</sup> | C <sub>2</sub> H <sub>5</sub> CN<br>g·cm <sup>-3</sup> | C <sub>3</sub> H <sub>7</sub> CN<br>g·cm <sup>-3</sup> | C <sub>4</sub> H <sub>9</sub> CN<br>g·cm <sup>-3</sup> | C <sub>5</sub> H <sub>11</sub> CN<br>g·cm <sup>-3</sup> |
|-----------|------------------------------------------|--------------------------------------------------------|--------------------------------------------------------|--------------------------------------------------------|---------------------------------------------------------|
| 293.15    | 0.78181                                  | 0.78200                                                | 0.79110                                                | 0.80010                                                | 0.80518                                                 |
| 298.15    | 0.77725                                  | 0.77708                                                | 0.78690                                                | 0.79490                                                | 0.8014                                                  |
| 303.15    | 0.77183                                  | 0.77194                                                | 0.78170                                                | 0.79085                                                | 0.79711                                                 |
| 308.15    | 0.76628                                  | --                                                     | --                                                     | --                                                     | --                                                      |
| 313.15    | 0.76056                                  | 0.76008                                                | 0.77157                                                | 0.78131                                                | 0.78871                                                 |
| 318.15    | 0.75498                                  | --                                                     | --                                                     | 0.80010                                                | --                                                      |

**Table S15.** Density Linear Fit Parameters ( $\rho = A + B \cdot T$ ).

| Alkyl Nitrile                     | A<br>g·cm <sup>-3</sup> | B<br>g·cm <sup>-3</sup> T <sup>-1</sup> | R <sup>2</sup> |
|-----------------------------------|-------------------------|-----------------------------------------|----------------|
| CH <sub>3</sub> CN                | 1.11014                 | -1.12 x 10 <sup>-3</sup>                | 0.99992        |
| C <sub>2</sub> H <sub>5</sub> CN  | 1.105                   | -1.1 x 10 <sup>-3</sup>                 | 0.9979         |
| C <sub>3</sub> H <sub>7</sub> CN  | 1.0853                  | -9.86114 x 10 <sup>-4</sup>             | 0.99857        |
| C <sub>4</sub> H <sub>9</sub> CN  | 1.07257                 | -9.300557 x 10 <sup>-4</sup>            | 0.99883        |
| C <sub>5</sub> H <sub>11</sub> CN | 1.04818                 | -8.28343 x 10 <sup>-4</sup>             | 0.99911        |

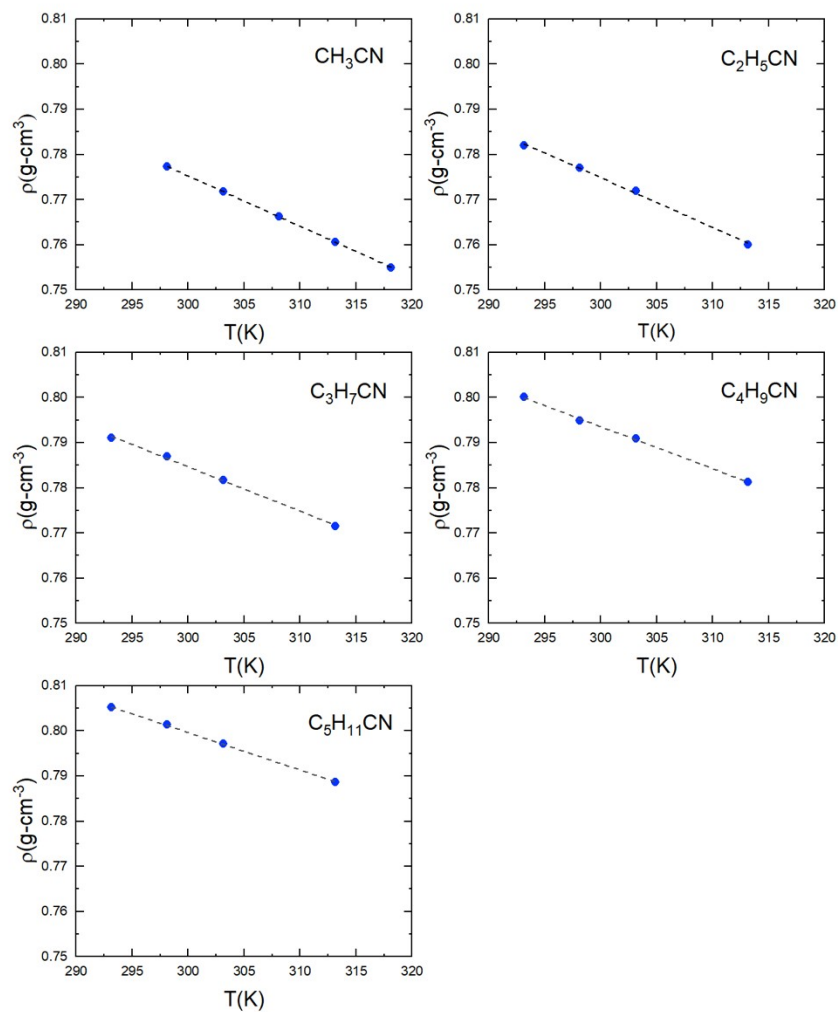

**Figure S6.** Densities of *n*-alkyl cyanides versus temperature. Dashed lines are fits of  $\rho = A + B \cdot T$  to the data (see Table S15 for values fit parameters).

## S6. Surface tensions of alkyl nitriles.

Table S16 gives the literature values<sup>6</sup> of the surface tensions of *n*-alkyl nitriles as a function of temperature, with plots of the surface tension vs. temperature shown in Figure S7 and linear fit parameters listed in Table S17.

**Table S16.** Surface Tension of Alkyl Nitriles.

| Temperature (K) | CH <sub>3</sub> CN<br>$\gamma$ (dyn·cm <sup>-1</sup> ) | C <sub>2</sub> H <sub>5</sub> CN<br>$\gamma$ (dyn·cm <sup>-1</sup> ) | C <sub>3</sub> H <sub>7</sub> CN<br>$\gamma$ (dyn·cm <sup>-1</sup> ) | C <sub>4</sub> H <sub>9</sub> CN<br>$\gamma$ (dyn·cm <sup>-1</sup> ) | C <sub>5</sub> H <sub>11</sub> CN<br>$\gamma$ (dyn·cm <sup>-1</sup> ) |
|-----------------|--------------------------------------------------------|----------------------------------------------------------------------|----------------------------------------------------------------------|----------------------------------------------------------------------|-----------------------------------------------------------------------|
| 293.15          | 29.29                                                  | 27.32                                                                | 27.44                                                                | 27.41                                                                | 27.83                                                                 |
| 303.15          | 28.03                                                  | 26.17                                                                | 26.17                                                                | 26.47                                                                | 26.92                                                                 |
| 313.15          | 26.77                                                  | 25.02                                                                | 25.36                                                                | 25.53                                                                | 26.01                                                                 |
| 323.15          | 25.5                                                   | 23.86                                                                | 24.32                                                                | 24.6                                                                 | 25.10                                                                 |
| 333.15          | 24.24                                                  | 22.71                                                                | 23.29                                                                | 23.66                                                                | 24.20                                                                 |
| 343.15          | --                                                     | --                                                                   | 22.25                                                                | 22.72                                                                | 23.29                                                                 |
| 353.15          | --                                                     | --                                                                   | 21.21                                                                | 21.78                                                                | 22.38                                                                 |
| 363.15          | --                                                     | --                                                                   | 20.18                                                                | 20.85                                                                | 21.48                                                                 |

1 dyn·cm<sup>-1</sup> = 0.001 Nm<sup>-1</sup>

**Table S17.** Surface Tension Linear Fit Parameters ( $\gamma = A + B \cdot T$ ).

| Alkyl Nitrile                     | <i>A</i><br>dyn·cm <sup>-1</sup> | <i>B</i><br>dyn·cm <sup>-1</sup> T <sup>-1</sup> | R <sup>2</sup> |
|-----------------------------------|----------------------------------|--------------------------------------------------|----------------|
| CH <sub>3</sub> CN                | 66.317                           | -0.1263                                          | 1              |
| C <sub>2</sub> H <sub>5</sub> CN  | 61.122                           | -0.1153                                          | 1              |
| C <sub>3</sub> H <sub>7</sub> CN  | 57.366                           | -0.1024                                          | 0.9991         |
| C <sub>4</sub> H <sub>9</sub> CN  | 54.888                           | -0.0937                                          | 1              |
| C <sub>5</sub> H <sub>11</sub> CN | 54.423                           | -0.0907                                          | 1              |



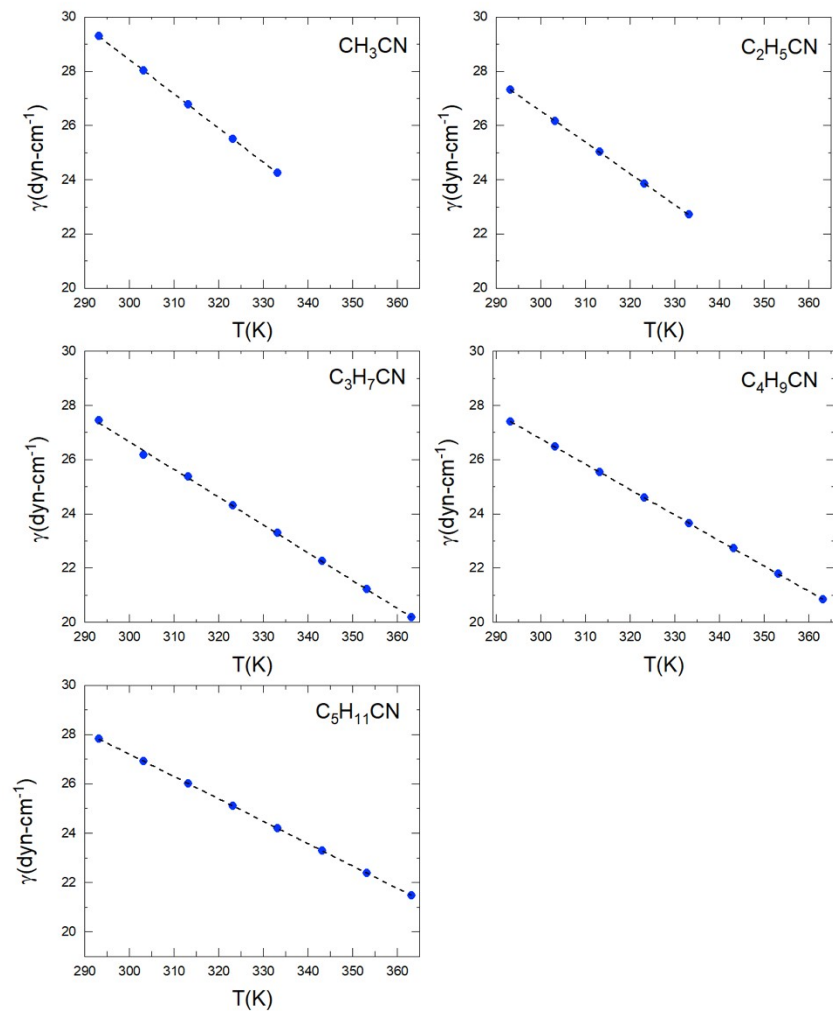

**Figure S7.** Surface tensions of *n*-alkyl cyanides versus temperature. Dashed lines are fits of  $\gamma = A + B \cdot T$  to the data (see Table S17 for values of fit parameters).

## S7. Frequency-physical property correlations

**Table S18.** Parameters for Correlation of Physical Properties to RSD Frequencies.<sup>a-c</sup>

| Alkyl<br>Cyanide                  | $M$<br>kg-mol <sup>-1</sup> | $\rho$<br>kg-m <sup>-3</sup> | $\gamma$<br>N-m <sup>-1</sup> | $I_{(xx+zz)/2}$<br>a.u. | $I_{\text{perp}}$<br>10 <sup>-48</sup> kg-m <sup>2</sup> | $(\gamma/M)^{1/2}$<br>m <sup>1/2</sup> s <sup>-1</sup> mol <sup>1/2</sup> | $(\gamma/\rho)^{1/2}$<br>10 <sup>-3</sup> m <sup>3/2</sup> s <sup>-1</sup> | $(\gamma/I_{\text{perp}})^{1/2}$<br>10 <sup>21</sup> m <sup>1/2</sup> s <sup>-1</sup> |
|-----------------------------------|-----------------------------|------------------------------|-------------------------------|-------------------------|----------------------------------------------------------|---------------------------------------------------------------------------|----------------------------------------------------------------------------|---------------------------------------------------------------------------------------|
| CH <sub>3</sub> CN                | 0.04105<br>2                | 781.81                       | 0.02929                       | 197.39                  | 924.38                                                   | 0.8447                                                                    | 6.121                                                                      | 5.629                                                                                 |
| C <sub>2</sub> H <sub>5</sub> CN  | 0.05507<br>9                | 782.00                       | 0.02732                       | 403.14                  | 1887.90                                                  | 0.7043                                                                    | 5.911                                                                      | 3.804                                                                                 |
| C <sub>3</sub> H <sub>7</sub> CN  | 0.06910<br>6                | 791.10                       | 0.02744                       | 813.40                  | 3809.15                                                  | 0.6301                                                                    | 5.889                                                                      | 2.684                                                                                 |
| C <sub>4</sub> H <sub>9</sub> CN  | 0.08313<br>3                | 800.10                       | 0.02741                       | 1243.85                 | 5824.95                                                  | 0.5742                                                                    | 5.853                                                                      | 2.169                                                                                 |
| C <sub>5</sub> H <sub>11</sub> CN | 0.09716<br>0                | 805.18                       | 0.02783                       | 2001.97                 | 9375.23                                                  | 0.5351                                                                    | 5.879                                                                      | 1.723                                                                                 |

<sup>a</sup>Values of  $\rho$ (S.I.) and  $\gamma$ (S.I.) at 20 °C (293.15 K).

<sup>b</sup>Values of  $I_{(xx+zz)/2}$  (a.u.) are the average values of  $I_{xx}$ (a.u.) and  $I_{zz}$ (a.u.) (see Table S9).

<sup>c</sup> $I_{\text{perp}}$ (S.I. units) =  $4.683 \times 10^{-48} \times I_{(xx+zz)/2}$  (a.u.)

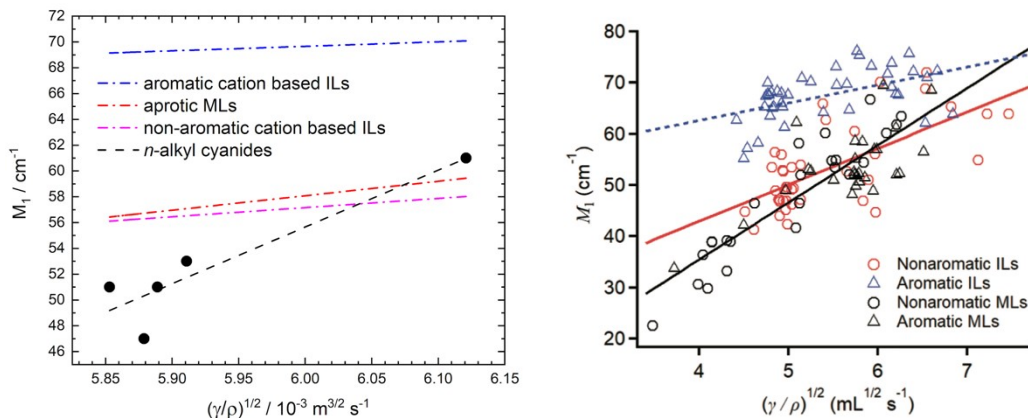

**Figure S8.** Plots of  $M_1$ , the first moment of the intermolecular band, versus  $(\gamma/\rho)^{1/2}$ , where  $\gamma$  is the surface tension and  $\rho$  is the density. The points in the plot on the left correspond to values of  $M_1$  of the  $n$ -alkyl cyanides obtained in the current study and the dashed line being linear least fit of the points. The dash-dot lines correspond to eq. S1-S3 below. The plot corresponding values of  $M_1$  versus  $(\gamma/\rho)^{1/2}$  for a much wider range of liquids was obtained from the literature with permission from ref. 7, copyright, 2020, Chemical Society of Japan.

The dashed-dot lines in the left plot in Fig. S8 were generated using the following equations

$$M_1(\text{cm}^{-1}) = 7.11 \times 10^3 \sqrt{\gamma(\text{Nm}^{-1})/\rho(\text{kg} \cdot \text{m}^{-3})} + 14.5 \quad (\text{S1})$$

$$M_1(\text{cm}^{-1}) = 3.51 \times 10^3 \sqrt{\gamma(\text{Nm}^{-1})/\rho(\text{kg} \cdot \text{m}^{-3})} + 48.5 \quad (\text{S2})$$

$$M_1(\text{cm}^{-1}) = 11.2 \times 10^3 \sqrt{\gamma(\text{Nm}^{-1})/\rho(\text{kg} \cdot \text{m}^{-3})} + 9.12 \quad (\text{S3})$$

where eqns. S1, S2, and S3 are respectively the SI unit equivalent of eqns. 22, 23, and 24 in the study of Shirota *et al.*<sup>7</sup> and correspond, respectively, to linear-least squares fits of the values  $M_1$  for nonaromatic cation based ILs, aromatic cation based ILs, and aprotic molecular liquids (MLs). The left plot shows that the range of values of  $(\gamma/\rho)^{1/2}$  for  $n$ -alkyl cyanides is much narrower than range of values of  $(\gamma/\rho)^{1/2}$  in the right plot. The points in the plot of the  $n$ -alkyl cyanides are lower than the line corresponding either to the aprotic MLs or the nonaromatic cation based ILs. However, if the data for the  $n$ -alkyl cyanides were included in the plot on right they would lie within the scatter of points corresponding to the aprotic MLs and nonaromatic

based ILs. This suggests that the intermolecular dynamics of *n*-alkyl cyanides are more like that of aprotic MLs or the nonaromatic cation ILs than that of the aromatic cation based ILs. The weaker correlation between  $M_1$  versus  $(\gamma/\rho)^{1/2}$  for the aromatic cation based ILs than for the non-aromatic cation based ILs is attributed to the difference in the micro-segregation structures of non-aromatic based ILs and non-aromatic based ILs.<sup>8</sup> The micro-segregation in ILs is characterized by the aggregation of the alkyl chains of the ILs to form nonpolar domains, which are imbedded in a polar ionic network.<sup>9</sup> The degree of heterogeneity as indicated by small wide angle X-ray scattering (SWAXS) data is greater for aromatic cation based ILs than for non-aromatic cation based ILs.<sup>10</sup> This difference is reflected in the Kerr signal being a probe of the ionic region in aromatic cation based ILs and the Kerr signal being a probe of the more homogenous structure of non-aromatic cation based ILs. Aprotic MLs should be largely homogeneous. It is therefore not surprising that the correlation between  $M_1$  versus  $(\gamma/\rho)^{1/2}$  for non-aromatic cation based ILs is like the correlation between  $M_1$  versus  $(\gamma/\rho)^{1/2}$  for aprotic ILs. One could imagine *n*-alkyl cyanides exhibiting some degree of heterogeneity due to the difference in polarities of the alkyl chains and the cyano groups. However, this difference should not be as great as in the case of ILs and would explain why the correlation between  $M_1$  versus  $(\gamma/\rho)^{1/2}$  is more in line with that of aprotic MLs, where micro-segregation is not expected. The strong ion interactions in ILs leads to the self-organizing behavior of ILs, which contributes to micro-segregation. In the case of *n*-alkyl cyanides, dipole-dipole interactions between the cyano groups are not strong enough to lead to the same self-organizing behavior as in ILs. For *n*-alkyl cyanides with long enough alkyl chains micro-segregation may occur. However, to our knowledge, and as confirm by a Web of Science search of the literature, there are no SWAXS

studies of the structure of *n*-alkyl cyanides that would show evidence for micro-segregation in these liquids.

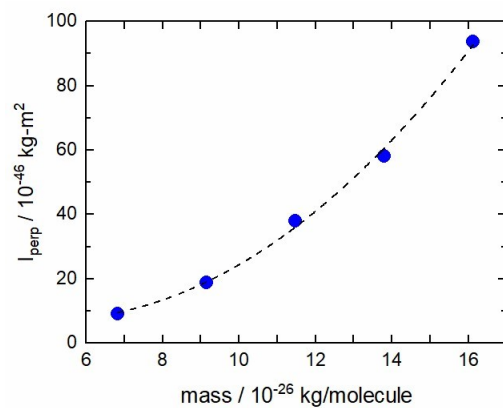

**Figure S9.** Plot of the moment of inertia  $I_{\text{perp}}$  versus molar mass  $M$ . The dashed line is fit of

$I_{\text{perp}} = A + B_1 \cdot M + B_2 \cdot M^2$  to the data, with  $A = 24.80$ ,  $B_1 = -6.974$ ,  $B_2 = 24.803$ ,  $R^2 = 0.998$ .

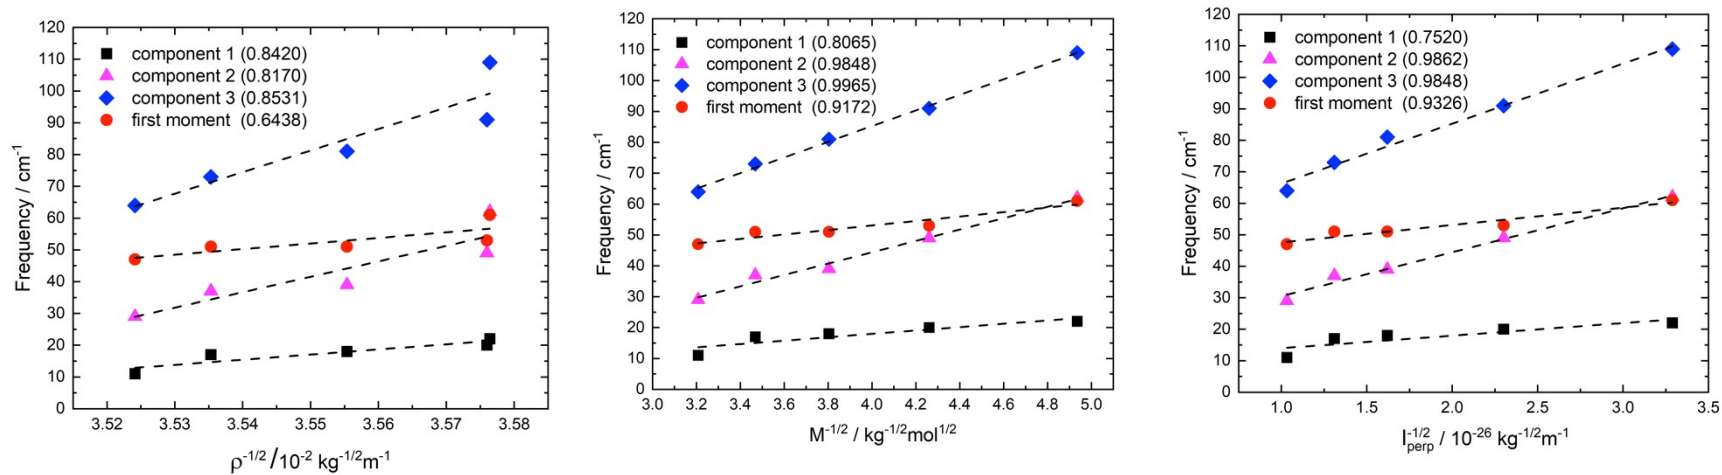

**Figure S10.** Plots of  $\omega_{\text{pk}}$  for low-, intermediate-, and high-frequency components (components 1-3) and  $M_1$ , the first moment of the intermolecular band versus  $(1/\rho)^{1/2}$ , where  $\rho$  is the density (left); versus  $(1/M)^{1/2}$ , where  $M$  is the molar mass (middle); and versus  $(1/I_{\text{perp}})^{1/2}$ , where  $I_{\text{perp}}$  is the moment of inertia for rotation about axis perpendicular to the long axis of the molecule (staggered-anti conformer) (right). The dashed lines through the points are linear least squares lines with the values of  $R^2$  given in the legends.

In Fig. S10 we wanted to determine how correlations between the frequencies of the component bands and intermolecular band and the physical properties of the *n*-alkyl cyanides would change if the surface tension  $\gamma$  was not considered. For the sake of conciseness, we will focus on the correlation between the first spectral moment  $M_1$ . The correlation between  $M_1$  and  $(\gamma/\rho)^{1/2}$  (Fig. 10) is stronger than the correlation between  $M_1$  and  $(1/\rho)^{1/2}$  (Fig S10) ( $R^2 = 0.644$  versus  $R^2 = 0.851$ ). In contrast, the correlation between  $M_1$  and  $(\gamma/I_{perp})^{1/2}$  is not very different than the correlation between  $M_1$  and  $(1/I_{perp})^{1/2}$  ( $R^2 = 0.940$  versus  $R^2 = 0.933$ ). Clearly, the correlation is significantly improved when surface tension is combined with density, but not improved when surface tension is combined with the moment of inertia. However, the correlation between  $M_1$  and  $(1/I_{perp})^{1/2}$  is considerably greater than between  $M_1$  and  $(1/\rho)^{1/2}$  ( $R^2 = 0.933$  versus  $R^2 = 0.644$ ), which we found to be case even when surface tension is combined with the moment of inertia. That the correlation between  $M_1$  and  $(1/M)^{1/2}$  is like the correlation between  $M_1$  and  $(1/I_{perp})^{1/2}$  is consequence of moment of inertia scaling quadratically with the molar mass (Fig. S9). As can be seen in the Fig. S10, these trends also hold for frequencies of the component bands.

## References

- <sup>1</sup> X. Zhu, R. A. Farrer, Q. Zhong, and J. T. Fourkas, *J. Phys-Condens. Mat.* 17, S4105 (2005).
- <sup>2</sup> B. J. Loughnane, A. Scodinu, R. A. Farrer, J. T. Fourkas, and U. Mohanty, *J. Chem. Phys.* 111, 2686 (1999).
- <sup>3</sup> J. T. Fourkas, in *Ultrafast Infrared and Raman Spectroscopy*, edited by M. D. Fayer (Marcel Dekker, Inc., New York, 2001), pp. 473.
- <sup>4</sup> T. K. G. Dabir S. Viswanath, Dasika H. L. Prasad, Nidamarty V. K. Dutt, Kalipatnapu Y. Rani, *Viscosity of Liquids: Theory, Estimation, Experiment, and Data* (Springer, Dordrecht, 2007),
- <sup>5</sup> X. H. M. Frenkel, Q. Dong, X. M. Yan, and R. D. Chirico, *Densities of Phenols, Aldehydes, Carboxylic Acids, Amines, Nitriles and Nitrohydrocarbons* (Springer, New York, 2002), Vol. IV/8I, Thermodynamic Properties of Organic Compounds and their Mixtures, 351-366.
- <sup>6</sup> J. J. Jasper, *J. Phys. Chem. Ref. Data* 1, 841 (1972).
- <sup>7</sup> H. Shirota, M. Ando, S. Kakinuma, and K. Takahashi, *Bull. Chem. Soc. Jpn.* 93, 1520 (2020).
- <sup>8</sup> H. Shirota, *ChemPhysChem* 13, 1638 (2012).
- <sup>9</sup> J. N. A. Canongia Lopes, and A. A. H. Padua, *J. Phys. Chem. B* 110, 3330 (2006).
- <sup>10</sup> A. Triolo, O. Russina, B. Fazio, G. A. Appetecchi, M. Carewska, and S. Passerini, *J. Chem. Phys.* 130, 164521 (2009).
